# Supplementary material for: The roles of intracellular and extracellular calcium in Bacillus subtilis biofilms
Source: PubMed Central journal article supplement — iScience. 2022 Apr 27;25(6):104308. doi: 10.1016/j.isci.2022.104308 (PMC9160756; doi:10.1016/j.isci.2022.104308), 2022-04-27
Supplement: mmc1.pdf [file mmc1.pdf]

iScience, Volume 25

## Supplemental information

### The roles of intracellular and extracellular calcium in *Bacillus subtilis* biofilms

Alona Keren-Paz, Harsh Maan, Iris Karunker, Tsviya Olender, Sergey Kapishnikov, Simon Dersch, Elena Kartvelishvily, Sharon G. Wolf, Assaf Gal, Peter L. Graumann, and Ilana Kolodkin-Gal

**The roles of intracellular and extracellular calcium in *Bacillus subtilis* biofilms**

Supplementary Figures 1-8

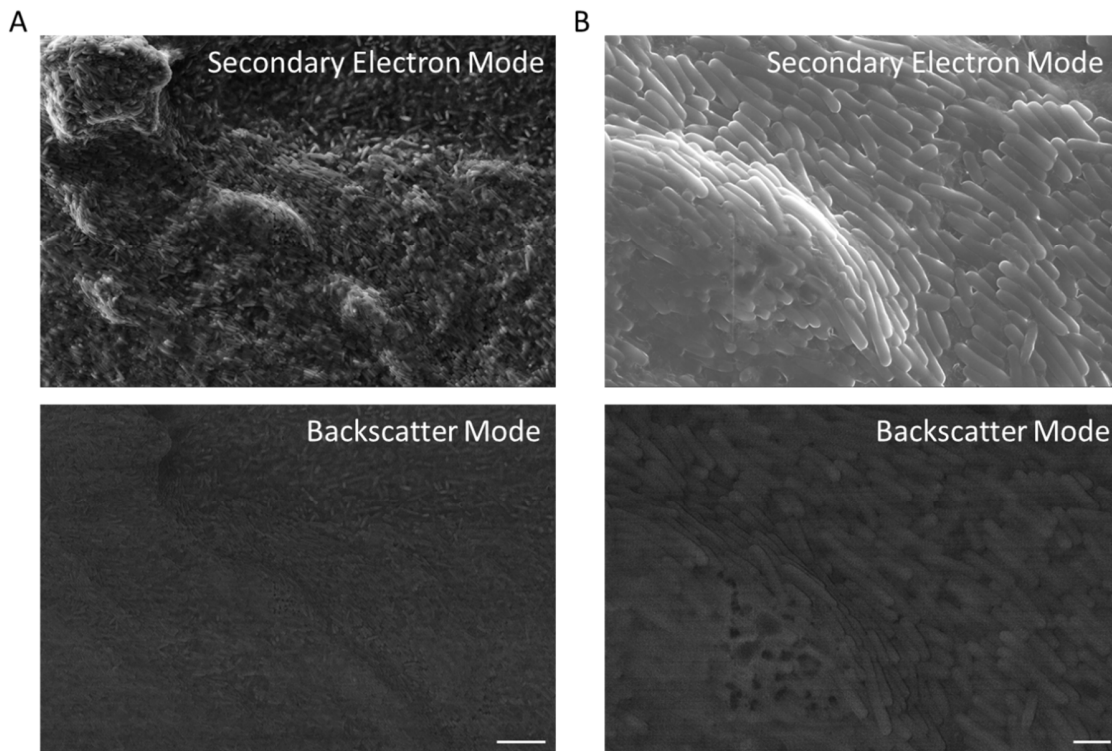

**Supplementary Figure 1, Visualizing extracellular calcium carbonate in the absence of external calcium supplementation, related to Figure 2.** Scanning Electron Microscopy (SEM) image of *B. subtilis* biofilm colony grown for 6 days on a B4 agar (without excess calcium). Shown are the surface of the biofilm in secondary electron and in backscattered mode of a representative field. **(A)** Magnification – X2500, scale bar – 10  $\mu\text{m}$ . **(B)**. Magnification – X10000, scale bar – 2  $\mu\text{m}$ . Representative fields (out of n=4 fields, from 8 independent experiments) are shown.

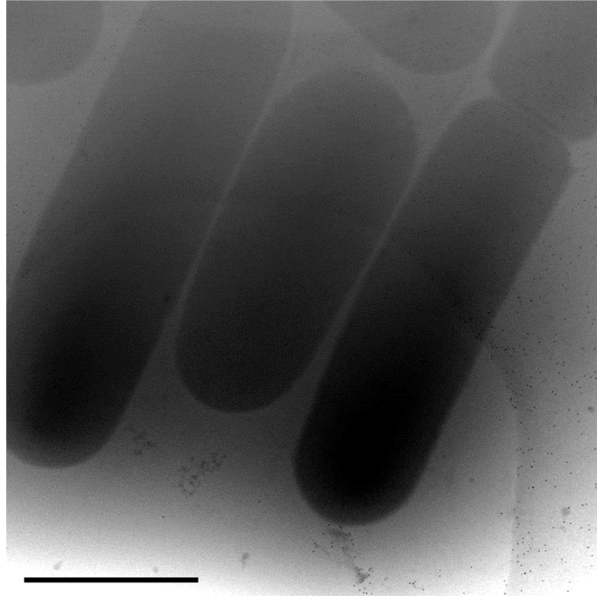

**Supplementary Figure 2, Visualizing intracellular calcium in the absence of external calcium supplementation, related to Figure 3.** Cryo-STEM bright-field images of representative biofilm cells from a *B. subtilis* colony grown for 10 days on B4 agar (without calcium). Scale bar 1  $\mu\text{m}$ . A representative field imaged (out of  $n=30$  cells, from 4 independent experiments) is shown.

|                      | Dead  | Spore | Mineral producer |
|----------------------|-------|-------|------------------|
| Structured (n=510)   | 12.5% | 12.7% | 4%               |
| Total colony (n=308) | 7.5%  | 7.5%  | 1.6%             |

**Supplementary Figure 3, Analysis of a subpopulation containing intracellular calcium deposits, related to Figure 3.** Quantification of different subpopulations within a 6-day old *B. subtilis* biofilm colony, showing enrichment of cells with mineral foci in the structured areas (wrinkles) of the colony.

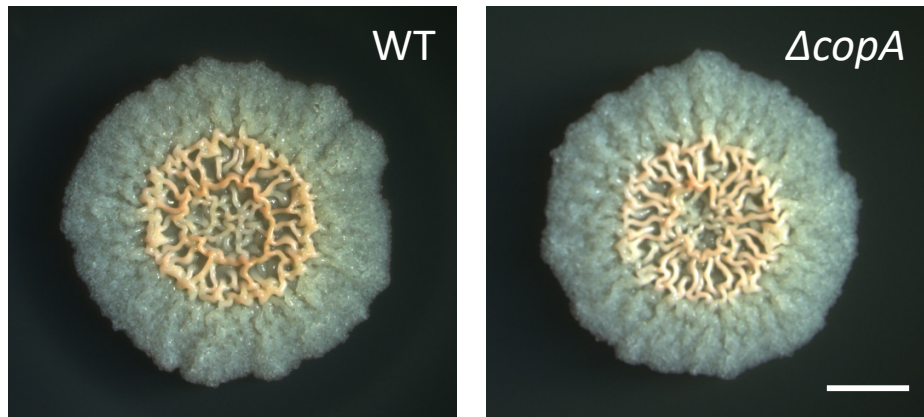

**Supplementary Figure 5, Biofilm formation is impaired in *copA* mutant, deleted for the putative target of CueR, related to Figure 4.** Light microscopy images of wild type *B. subtilis* (WT) and  $\Delta copA$  mutant. Biofilm colonies were grown on B4-Ca<sup>2+</sup> agar for 3 days at 30°C. Scale bar – 2 mm. The experiment was repeated 3 times, in a technical quadruplicate – and representative images are shown.

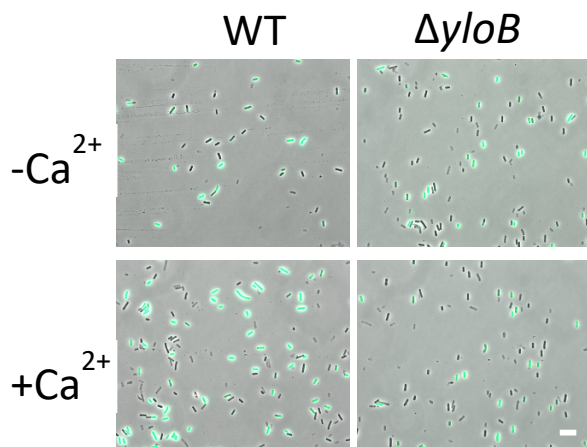

**Supplementary Figure 5. Visualizing intracellular calcium in *yloB* mutant biofilm cells, related to Figure 5.** Intracellular calcium levels of biofilm cells (n=200) stained with calcein-AM, a calcium-specific fluorescent dye as done previously (1). Biofilm cells were washed with PBS and mildly sonicated as done by us previously (2) prior to staining. Scale bar corresponds to 2  $\mu\text{m}$ .

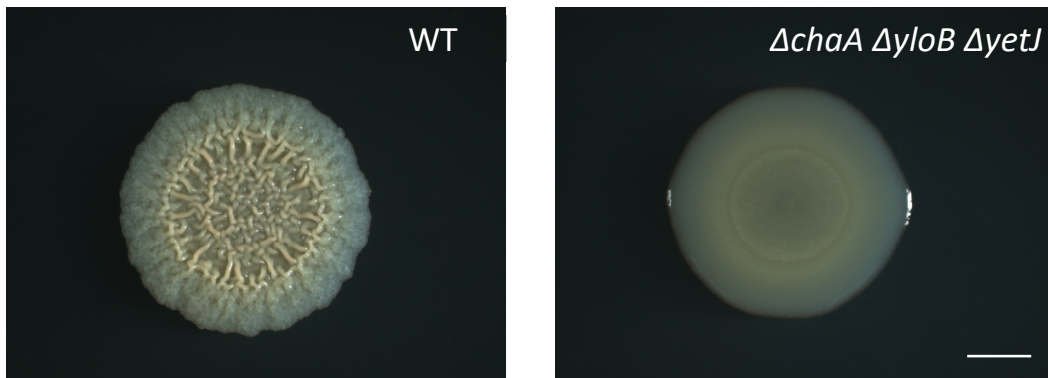

**Supplementary Figure 6, Biofilm formation is impaired in a *triple* mutant in calcium importers, related to Figure 5.** Light microscopy images of wild type (WT) and triple  $\Delta chaA \Delta yloB \Delta yetJ$  mutant. Biofilm colonies grown on solid B4- $Ca^{2+}$  agar for 3 days at 30°C. Scale bar – 2 mm. The experiment was repeated 3 times, in a technical quadruplicate – and representative images are shown.



| Medium             | pH             |                 |                 |                  |               | Medium Langelier Saturation index (LSI) |
|--------------------|----------------|-----------------|-----------------|------------------|---------------|-----------------------------------------|
|                    | medium control | far from colony | close to colony | below the colony | colony center |                                         |
| B4Ca <sup>2+</sup> | 6              | 7.5             | 7.75            | 7.75             | 8             | 0.51-0.015                              |

**Supplementary Figure 7, the medium is not saturated by calcium carbonate promoting spontaneous sedimentation, related to Figure 6.** pH of colonies and the agar medium they were grown on was assessed using pH-indicator strips (MColorpHast™). The experiment was conducted at least twice for each medium, with at least 4 technical repeats. LSI calculation refers to the indicated growth media. ND – undetermined. Solution is slightly scale forming and corrosive.

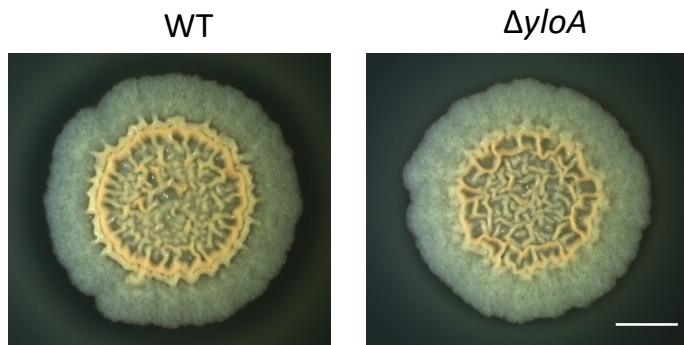

**Supporting Figure 8, *yloA* mutant does not have a biofilm phenotype, related to Figure 5.** Light microscopy images of wild type (WT) and  $\Delta yloA$  mutant. Biofilm colonies grown on solid B4- $\text{Ca}^{2+}$  agar for 3 days at 30°C. Scale bar – 2 mm. The experiment was repeated 3 times, in a technical quadruplicate – and representative images are shown.
